# Supplementary material for: Association between CT-Measured Abdominal Skeletal Muscle Mass and Pulmonary Function
Source: PubMed Central journal article supplement (PMC6572332; doi:10.3390/jcm8050667), 2019-05-12
Supplement: jcm-08-00667-s001.pdf [file jcm-08-00667-s001.pdf]

**Table S1.** Comparison of the baseline characteristics of males according to CT-measured skeletal muscle index (SMI<sub>CT</sub>) quartiles.

| Variable                                                  | Total (n=1406) | SMI <sub>CT</sub> quartiles |              |              |              | p for trend |
|-----------------------------------------------------------|----------------|-----------------------------|--------------|--------------|--------------|-------------|
|                                                           |                | Q1 (n=352)                  | Q2 (n=351)   | Q3 (n=351)   | Q4 (n=352)   |             |
| Age, years                                                | 53.5 ± 9.2     | 55.9 ± 9.0                  | 53.7 ± 9.1   | 52.6 ± 8.4   | 51.6 ± 9.6   | <0.001      |
| Systolic BP, mmHg                                         | 119.2 ± 12.9   | 121.6 ± 12.1                | 120.8 ± 12.7 | 117.8 ± 13.4 | 116.7 ± 12.8 | <0.001      |
| Diastolic BP, mmHg                                        | 78.5 ± 10.1    | 79.5 ± 9.9                  | 80.3 ± 9.8   | 77.4 ± 10.3  | 76.9 ± 9.8   | <0.001      |
| Height, cm                                                | 170.2 ± 5.6    | 167.7 ± 5.4                 | 169.8 ± 5.2  | 171.0 ± 5.2  | 172.3 ± 5.5  | <0.001      |
| Weight, kg                                                | 71.1 ± 8.7     | 72.4 ± 8.7                  | 72.1 ± 8.9   | 71.0 ± 8.0   | 68.7 ± 8.7   | <0.001      |
| BMI, kg/m <sup>2</sup>                                    | 24.5 ± 2.5     | 25.7 ± 2.5                  | 25.0 ± 2.3   | 24.3 ± 2.2   | 23.1 ± 2.3   | <0.001      |
| WC, cm                                                    | 88.0 ± 6.8     | 91.0 ± 6.5                  | 89.1 ± 6.6   | 87.6 ± 5.8   | 84.2 ± 6.6   | <0.001      |
| Smoking                                                   |                |                             |              |              |              |             |
| Never                                                     | 314 (22.3%)    | 94 (26.7%)                  | 84 (23.9%)   | 64 (18.2%)   | 72 (20.5%)   | 0.014       |
| Ex-smoker                                                 | 752 (53.5%)    | 196 (55.7%)                 | 194 (55.3%)  | 186 (53.0%)  | 176 (50.0%)  | 0.104       |
| Current smoker                                            | 340 (24.2%)    | 62 (17.6%)                  | 73 (20.8%)   | 101 (28.8%)  | 104 (29.5%)  | <0.001      |
| Exercise                                                  |                |                             |              |              |              |             |
| No regular exercise                                       | 364 (25.9%)    | 107 (30.4%)                 | 88 (25.1%)   | 78 (22.2%)   | 91 (25.9%)   | 0.115       |
| Moderate activity                                         | 505 (35.9%)    | 103 (29.3%)                 | 124 (35.3%)  | 150 (42.7%)  | 128 (36.4%)  | 0.012       |
| Rigorous activity (≥3/week)                               | 537 (38.2%)    | 142 (40.3%)                 | 139 (39.6%)  | 123 (35.0%)  | 133 (37.8%)  | 0.291       |
| Muscle, cm <sup>2</sup>                                   | 229.2 ± 29.4   | 204.2 ± 22.1                | 222.8 ± 20.8 | 234.9 ± 21.4 | 254.9 ± 27.0 | <0.001      |
| SMI <sub>CT</sub> , cm <sup>2</sup> /(kg/m <sup>2</sup> ) | 9.4 ± 1.3      | 8.0 ± 0.5                   | 8.9 ± 0.2    | 9.7 ± 0.3    | 11.1 ± 0.9   | <0.001      |
| TC, mg/dL                                                 | 189.9 ± 33.3   | 192.9 ± 34.0                | 192.9 ± 36.3 | 187.5 ± 32.3 | 186.4 ± 29.9 | 0.006       |
| TG, mg/dL                                                 | 131.5 ± 82.2   | 142.0 ± 90.8                | 141.3 ± 89.0 | 130.6 ± 80.1 | 112.2 ± 62.7 | <0.001      |
| HDL cholesterol, mg/dL                                    | 50.3 ± 11.5    | 49.7 ± 11.4                 | 49.3 ± 10.7  | 49.3 ± 11.0  | 53.0 ± 12.4  | <0.001      |
| LDL cholesterol, mg/dL                                    | 119.6 ± 29.1   | 123.8 ± 30.2                | 120.0 ± 29.0 | 118.6 ± 30.7 | 116.5 ± 26.2 | 0.022       |
| Fasting glucose, mg/dL                                    | 101.0 ± 17.3   | 101.7 ± 16.3                | 102.1 ± 16.5 | 100.5 ± 17.1 | 99.6 ± 18.9  | 0.053       |

|          |           |           |           |           |           |       |
|----------|-----------|-----------|-----------|-----------|-----------|-------|
| HbA1c, % | 5.8 ± 0.5 | 5.8 ± 0.5 | 5.8 ± 0.5 | 5.7 ± 0.6 | 5.7 ± 0.6 | 0.017 |
|----------|-----------|-----------|-----------|-----------|-----------|-------|

Data are presented as the mean ± standard deviation or as a percentage (%).

Cutoff values of SMI<sub>CT</sub> quartiles (cm<sup>2</sup>/(kg/m<sup>2</sup>)) for males, 8.53, 9.29, 10.15. Q: quartile; BP: blood pressure; BMI: body mass index; WC: waist circumference; TC: total cholesterol; TG: triglyceride; LDL: low-density lipoprotein; HDL: high-density lipoprotein; HbA1c: hemoglobin A1c.

**Table S2.** Comparison of the baseline characteristics of females according to CT-measured skeletal muscle index (SMI<sub>CT</sub>) quartiles.

| Variable               | Total (n=501) | SMI <sub>CT</sub> quartiles |              |              |              | p for trend |
|------------------------|---------------|-----------------------------|--------------|--------------|--------------|-------------|
|                        |               | Q1 (n=126)                  | Q2 (n=125)   | Q3 (n=125)   | Q4 (n=125)   |             |
| Age, years             | 52.2 ± 9.2    | 55.1 ± 8.5                  | 52.9 ± 9.0   | 51.3 ± 8.9   | 49.7 ± 9.4   | <0.001      |
| Systolic BP, mmHg      | 111.8 ± 14.4  | 115.1 ± 15.1                | 112.6 ± 13.6 | 112.0 ± 13.6 | 107.5 ± 14.3 | <0.001      |
| Diastolic BP, mmHg     | 69.8 ± 10.2   | 71.5 ± 9.6                  | 70.5 ± 10.5  | 70.0 ± 10.4  | 67.4 ± 10.2  | 0.001       |
| Height, cm             | 158.7 ± 5.0   | 157.3 ± 5.7                 | 158.1 ± 5.2  | 159.2 ± 4.0  | 160.4 ± 4.5  | <0.001      |
| Weight, kg             | 54.8 ± 6.8    | 58.3 ± 7.6                  | 55.8 ± 6.5   | 53.8 ± 5.7   | 51.2 ± 5.1   | <0.001      |
| BMI, kg/m <sup>2</sup> | 21.7 ± 2.5    | 23.6 ± 2.7                  | 22.3 ± 2.0   | 21.2 ± 2.0   | 19.9 ± 1.7   | <0.001      |
| WC, cm                 | 79.3 ± 6.8    | 83.7 ± 6.4                  | 81.2 ± 6.2   | 78.1 ± 5.5   | 74.0 ± 5.1   | <0.001      |
| Smoking                |               |                             |              |              |              |             |
| Never                  | 465 (92.8%)   | 122 (96.8%)                 | 118 (94.4%)  | 115 (92.0%)  | 110 (88.0%)  | 0.005       |
| Ex-smoker              | 17 (3.4%)     | 1 (0.8%)                    | 5 (4.0%)     | 5 (4.0%)     | 6 (4.8%)     | 0.096       |
| Current smoker         | 19 (3.8%)     | 3 (2.4%)                    | 2 (1.6%)     | 5 (4.0%)     | 9 (7.2%)     | 0.027       |
| Exercise               |               |                             |              |              |              |             |
| No regular exercise    | 184 (36.7%)   | 50 (39.7%)                  | 47 (37.6%)   | 46 (36.8%)   | 41 (32.8%)   | 0.265       |
| Moderate activity      | 149 (29.7%)   | 43 (34.1%)                  | 32 (25.6%)   | 38 (30.4%)   | 36 (28.8%)   | 0.538       |

|                                                           |                  |                  |                  |                  |                  |        |
|-----------------------------------------------------------|------------------|------------------|------------------|------------------|------------------|--------|
| Rigorous activity ( $\geq 3$ /week)                       | 168 (33.5%)      | 33 (26.2%)       | 46 (36.8%)       | 41 (32.8%)       | 48 (38.4%)       | 0.083  |
| Muscle, cm <sup>2</sup>                                   | 176.0 $\pm$ 23.2 | 156.8 $\pm$ 18.2 | 170.4 $\pm$ 15.7 | 178.2 $\pm$ 16.9 | 198.9 $\pm$ 19.0 | <0.001 |
| SMI <sub>CT</sub> , cm <sup>2</sup> /(kg/m <sup>2</sup> ) | 8.2 $\pm$ 1.4    | 6.7 $\pm$ 0.5    | 7.6 $\pm$ 0.2    | 8.4 $\pm$ 0.3    | 10.0 $\pm$ 1.0   | <0.001 |
| TC, mg/dL                                                 | 198.3 $\pm$ 34.9 | 203.7 $\pm$ 36.9 | 204.8 $\pm$ 38.7 | 191.7 $\pm$ 29.2 | 193.0 $\pm$ 32.1 | 0.015  |
| TG, mg/dL                                                 | 93.7 $\pm$ 60.3  | 105.1 $\pm$ 45.0 | 113.4 $\pm$ 86.3 | 84.5 $\pm$ 48.2  | 72.1 $\pm$ 42.5  | <0.001 |
| HDL cholesterol, mg/dL                                    | 60.2 $\pm$ 13.3  | 55.9 $\pm$ 11.9  | 59.4 $\pm$ 13.3  | 61.6 $\pm$ 13.1  | 64.1 $\pm$ 13.7  | <0.001 |
| LDL cholesterol, mg/dL                                    | 120.0 $\pm$ 30.5 | 128.4 $\pm$ 31.9 | 124.6 $\pm$ 35.1 | 113.5 $\pm$ 25.2 | 114.3 $\pm$ 27.5 | 0.008  |
| Fasting glucose, mg/dL                                    | 92.7 $\pm$ 12.7  | 96.2 $\pm$ 11.9  | 93.9 $\pm$ 12.4  | 92.3 $\pm$ 16.1  | 88.3 $\pm$ 7.7   | <0.001 |
| HbA1c, %                                                  | 5.7 $\pm$ 0.4    | 5.8 $\pm$ 0.4    | 5.8 $\pm$ 0.5    | 5.7 $\pm$ 0.5    | 5.6 $\pm$ 0.3    | <0.001 |

Data are presented as the mean  $\pm$  standard deviation or as a percentage (%).

Cutoff values of SMI<sub>CT</sub> quartiles (cm<sup>2</sup>/(kg/m<sup>2</sup>)) for females, 7.26, 7.94, 8.94. Q: quartile; BP: blood pressure; BMI: body mass index; WC: waist circumference; TC: total cholesterol; TG: triglyceride; LDL: low-density lipoprotein; HDL: high-density lipoprotein; HbA1c: hemoglobin A1c.

**Table S3.** Comparison of PFT values between males according to CT-measured skeletal muscle index (SMI<sub>CT</sub>) quartiles.

| Variable                 | Total (n=1406)   | SMI <sub>CT</sub> quartiles |                  |                  |                  | p for trend |
|--------------------------|------------------|-----------------------------|------------------|------------------|------------------|-------------|
|                          |                  | Q1 (n=352)                  | Q2 (n=351)       | Q3 (n=351)       | Q4 (n=352)       |             |
| FVC, liters              | 4.2 $\pm$ 0.6    | 3.9 $\pm$ 0.6               | 4.1 $\pm$ 0.6    | 4.3 $\pm$ 0.6    | 4.4 $\pm$ 0.6    | <0.001      |
| FVC, % predicted         | 96.2 $\pm$ 11.3  | 94.0 $\pm$ 11.0             | 96.0 $\pm$ 11.4  | 97.0 $\pm$ 11.4  | 98.0 $\pm$ 11.0  | <0.001      |
| Predicted FVC (%) < 80%  | 86 (6.1%)        | 30 (8.5%)                   | 20 (5.7%)        | 22 (6.3%)        | 14 (4.0%)        | 0.022       |
| FEV1, liters             | 3.3 $\pm$ 0.6    | 3.1 $\pm$ 0.5               | 3.3 $\pm$ 0.5    | 3.4 $\pm$ 0.6    | 3.5 $\pm$ 0.6    | <0.001      |
| FEV1, % predicted        | 103.3 $\pm$ 13.5 | 101.4 $\pm$ 13.7            | 102.7 $\pm$ 13.5 | 103.8 $\pm$ 13.8 | 105.3 $\pm$ 12.6 | <0.001      |
| Predicted FEV1 (%) < 80% | 54 (3.8%)        | 19 (5.4%)                   | 17 (4.8%)        | 12 (3.4%)        | 6 (1.7%)         | 0.006       |
| FEV1/FVC (%)             | 78.9 $\pm$ 6.4   | 78.8 $\pm$ 6.4              | 78.6 $\pm$ 6.1   | 78.8 $\pm$ 6.4   | 79.3 $\pm$ 6.5   | 0.153       |
| FEV1/FVC < 70%           | 95 (6.8%)        | 26 (7.4%)                   | 23 (6.6%)        | 24 (6.8%)        | 22 (6.2%)        | 0.601       |

Data are presented as the mean  $\pm$  standard deviation or as a percentage (%). Cutoff values of SMI<sub>CT</sub> quartiles (cm<sup>2</sup>/(kg/m<sup>2</sup>)) for males, 8.53, 9.29, 10.15.

**Table S4.** Comparison of PFT values between females according to CT-measured skeletal muscle index (SMI<sub>CT</sub>) quartiles.

| Variable                 | Total (n=501)    | SMI <sub>CT</sub> quartiles |                  |                  |                  | p for trend |
|--------------------------|------------------|-----------------------------|------------------|------------------|------------------|-------------|
|                          |                  | Q1 (n=126)                  | Q2 (n=125)       | Q3 (n=125)       | Q4 (n=125)       |             |
| FVC, liters              | 3.0 $\pm$ 0.4    | 2.9 $\pm$ 0.5               | 3.0 $\pm$ 0.4    | 3.1 $\pm$ 0.4    | 3.1 $\pm$ 0.4    | <0.001      |
| FVC, % predicted         | 98.2 $\pm$ 12.0  | 98.0 $\pm$ 11.8             | 98.8 $\pm$ 10.9  | 98.3 $\pm$ 13.3  | 97.6 $\pm$ 11.9  | 0.539       |
| Predicted FVC (%) < 80%  | 15 (3.0%)        | 5 (4.0%)                    | 4 (3.2%)         | 3 (2.4%)         | 3 (2.4%)         | 0.418       |
| FEV1, liters             | 2.5 $\pm$ 0.4    | 2.3 $\pm$ 0.4               | 2.4 $\pm$ 0.4    | 2.5 $\pm$ 0.4    | 2.6 $\pm$ 0.4    | <0.001      |
| FEV1, % predicted        | 106.7 $\pm$ 14.0 | 107.3 $\pm$ 13.9            | 106.7 $\pm$ 12.9 | 106.2 $\pm$ 15.2 | 106.8 $\pm$ 13.9 | 0.952       |
| Predicted FEV1 (%) < 80% | 10 (2.0%)        | 2 (1.6%)                    | 2 (1.6%)         | 3 (2.4%)         | 3 (2.4%)         | 0.562       |
| FEV1/FVC (%)             | 81.8 $\pm$ 6.2   | 81.5 $\pm$ 5.7              | 81.1 $\pm$ 5.6   | 81.6 $\pm$ 6.3   | 83.1 $\pm$ 7.1   | 0.008       |
| FEV1/FVC < 70%           | 10 (2.0%)        | 2 (1.6%)                    | 1 (0.8%)         | 4 (3.2%)         | 3 (2.4%)         | 0.387       |

Data are presented as the mean  $\pm$  standard deviation or as a percentage (%). Cutoff values of SMI<sub>CT</sub> quartiles (cm<sup>2</sup>/(kg/m<sup>2</sup>)) for females, 7.26, 7.94, 8.94.
